1 **Two Regulators of G-protein signaling (RGS) proteins FlbA1 and FlbA2 differentially**  
2 **regulate fumonisin B1 biosynthesis in *Fusarium verticillioides***

3

4 Huijuan Yan<sup>1</sup>, Zehua Zhou<sup>1,2</sup> and Won Bo Shim<sup>1</sup> \*

5

6 <sup>1</sup>Department of Plant Pathology and Microbiology, Texas A&M University, College Station,  
7 TX 77843, USA

8 <sup>2</sup>College of Plant Protection, Nanjing Agricultural University, Nanjing 210095, China.

9

10 \* Corresponding author: Won Bo Shim, Email: [wbshim@tamu.edu](mailto:wbshim@tamu.edu)

11

12

13

14

15

16

17

18

19

20

21

22

23

24 **Abstract**

25

26 Fumonisin are a group of mycotoxins produced by maize pathogen *Fusarium verticillioides*  
27 that pose health concerns to humans and animals. Yet we still lack a clear understanding of  
28 the mechanism of fumonisin regulation during pathogenesis. The heterotrimeric G protein  
29 complex, which consists of G $\alpha$ , G $\beta$ , and G $\gamma$  subunits, plays an important role in transducing  
30 signals under environmental stress. Furthermore, regulators of G-protein signaling (RGS)  
31 proteins act as negative regulators in heterotrimeric G protein signaling. Earlier studies  
32 demonstrated that G $\alpha$  and G $\beta$  subunits are positive regulators of fumonisin B1 (FB1)  
33 biosynthesis and that two RGS genes, FvFlbA1 and FvFlbA2, were highly upregulated in  
34 G $\beta$  deletion mutant  $\Delta$ Fvgbb1. *Saccharomyces cerevisiae* and *Aspergillus nidulans* contain a  
35 single copy of FlbA, but *F. verticillioides* has two putative FvFlbA paralogs, FvFlbA1 and  
36 FvFlbA2. Importantly, FvFlbA2 has a negative role in FB1 regulation. In this study, we  
37 further characterized functional roles of FvFlbA1 and FvFlbA2. While  $\Delta$ FvflbA1 deletion  
38 mutant exhibited no significant defects,  $\Delta$ FvflbA2 and  $\Delta$ FvflbA2/A1 mutants showed  
39 thinner aerial hyphal growth while promoting FB1 production. FvFlbA2 is required for  
40 proper expression of key conidia regulation genes, including putative *FvBRLA*, *FvWETA*,  
41 and *FvABAA*, while suppressing *FUM21*, *FUM1*, and *FUM8* expression. Split luciferase  
42 assays suggest that FvFlbA paralogs interact with key heterotrimeric G protein components  
43 to impact *F. verticillioides* FB1 production and asexual development.

44 **Key Words:** *Fusarium verticillioides*, G protein, RGS protein, FlbA, fumonisin B1

45

46 **1. Introduction**

47

48 *Fusarium verticillioides* (teleomorph: *Gibberella moniliformis* Wineland) is a fungal  
49 pathogen responsible for causing ear rot, stalk rot and seedling blight in maize worldwide.

50 The fungus primarily utilizes conidia for dissemination, and the pathogen is capable of  
51 infecting and colonizing all developmental stages of maize plants ([Blacutt, et al. 2018](#)).

52 Importantly, kernel infections by *F. verticillioides* lead to the production of fumonisins, a  
53 group of carcinogenic mycotoxins. Fumonisin B1 (FB1) is the most abundant and toxic form

54 among fumonisin analogs, and long-term exposure to FB1 is linked to severe human and  
55 animal diseases including esophageal cancer and neural tube defects. Structurally,

56 fumonisins contain a 19-20 carbon polyketide backbone, and usually multiple genes are  
57 involved in the biosynthesis of this complex group of secondary metabolites. A number of

58 studies have demonstrated that genes involved in microbial secondary metabolite  
59 biosynthesis are organized as gene clusters ([Alexander, et al. 2009](#), [Kjaerbolling, et al. 2018](#),

60 [Ma, et al. 2010](#)). The fumonisin biosynthesis gene cluster (referred to as the “*FUM* cluster”)  
61 was first discovered by Proctor et al (1999), which consists of 16 genes encoding

62 biosynthetic enzymes and regulatory proteins ([Proctor, et al. 2013](#)). Inactivation of each of  
63 the key genes, e.g. *FUM1*, *FUM6*, *FUM8*, and *FUM21*, severely disturbed the production of

64 fumonisins. Notably, previous studies demonstrated that these fumonisins-non-producing  
65 mutant strains did not significantly reduce maize ear rot in field tests ([Desjardins, et al. 2002](#),

66 [Desjardins and Plattner 2000](#)), which demonstrated that fumonisins are not essential for  
67 *Fusarium* ear rot pathogenicity. As we continue to seek strategies to minimize FB1

68 contamination in infested maize, we still lack a clear understanding on how *F. verticillioides*  
69 sense ambient environmental and host cues to regulate fumonisin biosynthesis.

70

71 G protein-coupled receptors (GPCRs) are the largest group of membrane receptors  
72 containing seven transmembranes (TMs) that transduce signals from the external  
73 environment to the cell, enabling the organism to adjust to its environment ([Xue, et al. 2008](#)).

74 The canonical heterotrimeric G protein complex, which consists of  $\alpha$ ,  $\beta$  and  $\gamma$  subunits, plays  
75 important roles in transducing signals from GPCRs. When activated by specific ligands,  
76 GPCRs stimulate GDP to GTP exchange on the  $G\alpha$  subunit. Then, heterotrimeric G protein  
77 complex is dissociated into  $G\alpha$  subunit and  $G\beta\gamma$  dimer, which triggers various downstream  
78 signaling pathways. GPCR signaling is known to be attenuated by G-protein-coupled  
79 receptor kinases (GRKs) and  $\beta$ -arrestin in animals, which are absent in filamentous fungi  
80 ([Dohlman 2009](#)). However, studies have shown regulators of G protein signaling (RGS)

81 proteins in fungi act as GTPase-activating proteins, which promotes GTP hydrolysis of  $G\alpha$   
82 subunit back to GDP-bound inactive form that terminates GPCR and G protein signaling  
83 pathways. RGS proteins typically contain 130-amino-acid RGS domains, which promotes  
84 the binding of RGS proteins to the  $G\alpha$  subunit. Notably, other than the RGS domain, RGS  
85 proteins are known to contain diverse non-RGS domains such as DEP (*Dishevelled*, *Egl-10*  
86 and *Pleckstrin*), PX, PXA, nexin C and TM, which are linked to various signaling pathways.

87 For instance, the DEP domain in *Saccharomyces cerevisiae* ScSst2 was shown to interact  
88 with pheromone sensing Ste2 and mediated regulation of pheromone signaling responses  
89 ([Ballon, et al. 2006](#)).



90 *Aspergillus nidulans flbA* (for fluffy low *brlA* expression) was the first RGS protein  
91 identified in filamentous fungi, which is positively associated with conidiophore  
92 development and sterigmatocystin accumulation ([Hicks, et al. 1997](#), [Lee and Adams 1994](#)).  
93 The *flbA* deletion mutant was not able to facilitate the transition from vegetative growth to  
94 conidiophore development. Conversely, overexpression of *flbA* led to premature *stcU* gene  
95 expressions and sterigmatocystin biosynthesis ([Hicks, et al. 1997](#)). In *Magnaporthe oryzae*,  
96 an AnFlbA1 ortholog MoRgs1 was shown to be involved in asexual development,  
97 pathogenicity, and thigmotropism ([Liu, et al. 2007](#)). Additionally, MoRgs1 showed physical  
98 interaction with a non-canonical GPCR MoPth11 and colocalized with Rab7, a late  
99 endosome marker ([Ramanujam, et al. 2013](#)). Another well studied RGS protein, MoRgs7  
100 comprises of a N-terminal GPCR seven-transmembrane domain and a C-terminal RGS  
101 domain, which is critical for germ tube growth, cAMP signaling, and virulence in *M. oryzae*  
102 ([Zhang, et al. 2011a](#)).

103

104 Our earlier studies showed that functions of *F. verticillioides* G $\beta$  and G $\beta$ -like proteins are  
105 positively associated with FB1 production ([Sagaram and Shim 2007](#), [Yan and Shim 2020](#)).  
106 Furthermore, transcription levels of four RGS genes *FLBA1*, *FLBA2*, *RGSB*, and *RGSC1*  
107 were significantly altered in G $\beta$  deletion mutant  $\Delta$ Fv $\beta$ bb1 when compared to the wild-type  
108 *F. verticillioides* strain ([Mukherjee, et al. 2011](#)). Unlike *A. nidulans*, *F. verticillioides*  
109 contains two putative FvFlbA paralogs, which were designated FvFlbA1 and FvFlbA2.  
110 Intriguingly, FvFlbA2 deletion mutation showed a drastic increase in FB1 production  
111 ([Mukherjee, et al. 2011](#)). Also, FlbA1 and FlbA2 were important for regulating host response  
112 during the fungal infection in surface-sterilized viable maize kernels. In this study, our aim

113 was to further examine the regulatory mechanisms of the two FlbA genes in *F. verticillioides*  
114 and show how each gene plays unique roles and their relationship in FB1 biosynthesis.

115

## 116 **2. Material and methods**

117

### 118 2.1 Fungal strains and growth study

119

120 *F. verticillioides* M3125 was used as the wild-type strain in this study ([Yan and Shim 2020](#)).

121 For growth and conidia production, all strains were grown on 0.2xPDA, myro, YEPD and

122 V8 agar plates as described previously ([Yan, et al. 2019](#)). Spore germination assay was

123 performed following our previously described methods ([Yan and Shim 2020](#)). For carbon

124 utilization assay, Czapek-Dox agar was modified with various carbon sources such as

125 sucrose (10g/L), dextrose (10g/L), fructose (10g/L) and xylose (10g/L) ([Yan, et al. 2019](#)).

126 Fungal growth was determined by measuring colony diameter on agar plates after 8 days of

127 incubation at room temperature. For mycelial weight assay, we inoculated 0.5 ml of WT and

128 mutant conidia ( $10^6$ /ml) into 100 ml YEPD broth, incubated in room temperature with

129 constant shaking, and harvested at indicated time points. For stress assays, 4  $\mu$ l spore

130 suspension ( $10^6$ /ml) was inoculated on 0.2xPDA agar plates and were grown with various

131 stressors including 0.01% SDS, 2 mM H<sub>2</sub>O<sub>2</sub>, 0.6 M NaCl. All experiments were performed

132 with at least three replicates. Inhibition rate was calculated as described previously ([Yan and](#)

133 [Shim 2020](#)).

134

### 135 2.2 Gene deletion and complementation

136

137 Both  $\Delta FvflbA1$  and  $\Delta FvflbA2$  knockout mutants were generated in the wild-type strain via  
138 split-marker approach ([Yan and Shim 2020](#)). Briefly, partial hygromycin B  
139 phosphotransferase gene (*HPH*) designated as *PH* (929bp) and *HP* (765bp) were used to  
140 fuse with left and right flanking regions of the targeted gene with joint-PCR approach. All  
141 knockout constructs were amplified using Q5 High-Fidelity DNA Polymerase (New  
142 England Biolabs) except the second step of joint PCR using Taq enzyme (New England  
143 Biolabs) ([Yu, et al. 2004](#)). To further characterize the function of two FvFlbA paralogs in *F.*  
144 *verticillioides*, we generated the  $\Delta FvflbA2/A1$  double mutants in the  $\Delta FvflbA2$  background;  
145 partial geneticin resistance gene (*GEN*) designated as *GE* (1183 bp) and *EN* (1021 bp) were  
146 used to fuse with left and right flanking regions of *FvFLBA1* gene, and these constructs were  
147 transformed into with  $\Delta FvflbA2$  protoplast. Complementation fragments were amplified by  
148 Phusion Flash High-Fidelity PCR Master Mix (Thermo Scientific) and transformed into  
149 designated mutant protoplasts. All transformants were screened by PCR using Phire Plant  
150 Direct PCR Kit (Thermo Scientific) and verified by qPCR (Thermo Scientific). All primers  
151 are listed in Table 1.

152

153 2.3 Fumonisin B1, virulence, and gene expression assays

154

155 To study the FB1 production, cracked autoclaved kernels (2 g) and four surface sterilized  
156 kernels were used as described previously ([Christensen, et al. 2012](#), [Yan and Shim 2020](#)).  
157 Briefly, once kernels were prepared in scintillation vials, fungal spore solutions (200  $\mu$ L,  
158  $10^6$ /mL) were inoculated in each vial and cultivated at room temperature for eight days. FB1

159 and ergosterol extraction and HPLC analyses were performed as described previously  
160 ([Christensen, et al. 2012](#), [Shim and Woloshuk 1999](#)). FB1 levels were normalized to  
161 ergosterol contents. These experiments were performed with three biological replicates.  
162 Seedling rot was assayed by inoculating fungal spore suspension (5  $\mu$ L,  $10^6$ /mL) and imaged  
163 after one-week growth in the dark room as described previously ([Yan, et al. 2019](#)). For qPCR  
164 analysis of conidiation-related genes and key *FUM* genes, mycelia were harvested from 7-  
165 day-old culture grown in myro liquid medium at 150 rpm. Primers for three conidia related  
166 genes, as well as *FUM1*, *FUM8* and *FUM21*, were described in previous studies ([Yan, et al.](#)  
167 [2019](#), [Zhang, et al. 2011b](#)). Relative expression levels of each gene were calculated using a  
168  $2^{-\Delta\Delta CT}$  method and normalized with *F. verticillioides*  $\beta$ -tubulin gene (FVEG\_04081). All  
169 qPCR assays were performed with three replicates.

170

#### 171 2.4 Split luciferase complementation activity analysis

172

173 The coding sequences of PCR products were amplified by Q5 High-Fidelity DNA  
174 Polymerase and introduced to pFNLucG or pFCLucH by Gibson Assembly (New England  
175 Biolabs) ([Kim, et al. 2012](#)). Specifically, cDNAs of *FvFLBA1* and *FvFLBA2* were cloned  
176 into pFNLucH vector. cDNAs of *FvRAB5* (FVEG\_00504), *FvRAB7* (FVEG\_04809),  
177 *FvRAB11* (FVEG\_11336), *FvVPS36* (FVEG\_06233), *FvTLG2* (FVEG\_07363), *FvPEP12*  
178 (FVEG\_11540) were cloned into pFCLucH vector. *CLuc-FvGPA1*, *CLuc-FvGPA2*, *CLuc-*  
179 *FvGPA3*, *CLuc-FvGPB1*, and *CLuc-FvGGB1* were from our previous study ([Yan and Shim](#)  
180 [2020](#)). Transformation, selection and luciferase activity determination were performed as  
181 described previously ([Zhang, et al. 2018](#)).

182

### 183 3. Results

184

#### 185 3.1 Sequence analyses of FlbA1 and FlbA2 in *F. verticillioides*

186

187 Our previous study identified two FvFlbA paralogs in *F. verticillioides* including FvFlbA1  
188 (FVEG\_08855) and FvFlbA2 (FVEG\_06192) ([Mukherjee, et al. 2011](#)). The new annotation  
189 in FungiDB ([www.fungiDB.org](http://www.fungiDB.org)) predicted that FvFlbA1 and FvFlbA2 encode a 499-amino-  
190 acid and 517-amino-acid protein, respectively. FvFlbA1 and FvFlbA2 share 52% identity at  
191 the amino-acid level. To identify FlbA orthologs in other fungi, *F. verticillioides* FvFlbA2  
192 protein sequence was used in a BlastP query. Among fungal species we searched, only  
193 *Fusarium* species showed multiple copies of FlbA homologs. Both *F. verticillioides* and *F.*  
194 *graminearum* have two FlbA genes, and surprisingly, *F. oxysporum* has five putative FlbA  
195 paralogs. All FlbA orthologs are predicted to contain both DEP and RGS domains except  
196 that FvFlbA2 does not contain the RGS domain in the new annotation. Notably, FvFlbA1  
197 and FvFlbA2 belong to different branches in our phylogenetic tree analysis (Fig. 1), which  
198 suggested that they may have diverged early and evolved to perform distinct functions in *F.*  
199 *verticillioides*. Phylogenetic tree and domain analysis followed a previous description ([Yan](#)  
200 [and Shim 2020](#)).

201

#### 202 3.2 $\Delta$ FvflbA1 and $\Delta$ FvflbA2 mutants exhibit limited defects in vegetative growth

203

204 The two FvFlbA gene knockout mutants were generated by the split-marker approach (Fig.  
205 S2A). To confirm null mutations, *FvFLBA1* and *FvFLBA2* transcription levels in the mutants  
206 were tested by qPCR where expression of these target genes was not detectable when  
207 compared to the wild-type progenitor (Fig. S2D). The mutant  $\Delta FvflbA1$  showed no  
208 observable defect in terms of mycelial growth and conidiation on three different agar media.  
209 However,  $\Delta FvflbA2$  mutant showed slower growth on these media and also produced less  
210 conidia when compared to the wild type (Fig. 2). To further understand the relationship of  
211 two FvFlbA paralogs in *F. verticillioides*, we generated a  $\Delta FvflbA2/A1$  double mutant.  
212  $\Delta FvflbA2/A1$  exhibited more severe defects in aerial hyphae (Fig. 2). In particular, the  
213 double mutant showed almost non-detectable level of conidia production when compared to  
214 the wild type and single gene mutants (Fig. 3A). Surprisingly, we discovered that  
215  $\Delta FvflbA2/A1$  conidia, albeit the lower number of production, showed precocious conidial  
216 germination which was not observed in wild type or other mutants (Fig. 3B). Gene  
217 complementation strain  $\Delta FvflbA2$ -Com demonstrated full recovery of growth defects  
218 observed in  $\Delta FvflbA2$  strain.

219

### 220 3.3 FvFlbA2 is negatively associated with FB1 production

221

222 Our previous studies showed that RGS protein FvFlbA2 is negatively associated with FB1  
223 production, while G $\beta$  and one of the G $\alpha$  proteins positively regulate FB1 biosynthesis  
224 ([Mukherjee, et al. 2011](#), [Yan and Shim 2020](#)). To further understand the impact and  
225 relationship of the two FvFlbA genes in FB1 production, we analyzed FB1 levels by  
226 inoculating mutant strains on autoclaved cracked kernels and surface-sterilized living

227 kernels (Fig. 4A and B). The results showed that  $\Delta FvflbA2$  and  $\Delta FvflbA2/A1$  produced  
228 significantly higher levels of FB1 compared with wild-type and  $\Delta FvflbA1$  strains (Fig. 4C  
229 and D). Surprisingly,  $\Delta FvflbA2/A1$  produced a drastically higher FB1 level (>300%) in  
230 contrast to  $\Delta FvflbA2$  strain when FB1 assay was performed using surface-sterilized maize  
231 kernels (Fig. 4D). Meanwhile,  $\Delta FvflbA1$  produced similar levels of FB1 as the wild-type  
232 and complemented strains. This result suggested that FvFlbA2 serves as a negative regulator  
233 of FB1 production, but the impact was more dramatic with double deletion of two FvFlbA  
234 paralogs and when viable host factors are associated with triggering FB1 biosynthesis.

235

### 236 3.4 Expression levels of genes associated with conidiation and FB1 biosynthesis

237

238 The expression of *brlA* mRNA was not detectable in *A. nidulans flbA* mutant, which  
239 indicated that *flbA* is indispensable for *brlA* gene activation ([Lee and Adams 1994](#)). In our  
240 study,  $\Delta FvflbA2$  produced a lower count of conidia and germinated atypically in water in  
241 comparison to the wild type. To understand the impact of FvFlbA2 on asexual development  
242 at the molecular level, we analyzed the transcriptional expression of putative *BRLA*, *ABAA*  
243 and *WETA* genes in *F. verticillioides* wild-type and mutant strains. Our results showed that  
244 these three conidia-related genes were highly down-regulated in  $\Delta FvflbA2$  and  
245  $\Delta FvflbA2/A1$  but not in  $\Delta FvflbA1$  (Fig. 5A). This result partially explains why FvFlbA2  
246 function did not completely correlate with typical conidia production levels seen in *F.*  
247 *verticillioides*. To verify the role of the two paralogs in FB1 biosynthesis, we carried out  
248 qPCR analysis of three key *FUM* genes *FUM1*, *FUM8* and *FUM21*. Consistent with our  
249 FB1 results in myro liquid cultures (Fig. S3), key *FUM* genes were significantly up-regulated

250 in  $\Delta FvflbA2$  and  $\Delta FvflbA2/A1$  (Fig. 5B). Importantly, our results suggested that FvFlbA1  
251 and FvFlbA2 regulate distinct signaling pathways, but with FlbA2 playing a critical role in  
252 FB1 biosynthesis regulation.

253

254 3.5 *F. verticillioides* two FlbA paralogs are not required for stress responses, carbon  
255 utilization and virulence

256

257 To elucidate the roles of two FvFlbA proteins in response to environmental cues, we used  
258 various carbon sources including sucrose, dextrose, fructose and xylose to test if there are  
259 deficiencies in carbon sensing and utilization. Only minor vegetative growth defects were  
260 observed in  $\Delta FvflbA2$  and  $\Delta FvflvA2/A1$  mutants, suggesting that two FvFlbA paralogs are  
261 not critical for utilization of different carbon nutrients (Fig. 6A). Additionally, to test  
262 whether FvFlbA1 and FvFlbA2 are involved in cell wall integrity and various stress response  
263 signaling, we investigated the vegetative growth of mutants in the presence of SDS, H<sub>2</sub>O<sub>2</sub>,  
264 and osmotic (NaCl) stress agents in Czapek-Dox agar. We found that  $\Delta FvflbA2$  and  
265  $\Delta FvflvA2/A1$  mutants exhibited trivial defects in growth in all media tested compared to the  
266 wild-type progenitor (Fig. 6B). However,  $\Delta FvflbA2$  and  $\Delta FvflvA2/A1$  mutants showed no  
267 significant differences in terms of inhibition rate compared to regular Czapek-Dox medium  
268 growth. Lastly, we found no difference in wild type and all mutant strains when tested for  
269 capacities to cause seedling rot (Fig. 7A and B). These results suggest that both FvFlbA1  
270 and FvFlbA2 are dispensable for stress response, carbon utilization and virulence in *F.*  
271 *verticillioides*.

272



273 3.6 FvFlbA1 physically interacts with FvFlbA2 and heterotrimeric G proteins components

274

275 The defects in growth and higher accumulation of FB1 production observed in  $\Delta FvflvA2/A1$   
276 mutant raised a question whether FvFlbA1 and FvFlbA2 regulate other G protein signaling  
277 components in *F. verticillioides* through direct interaction. To test this, we performed split  
278 luciferase complementation assay in *F. verticillioides in vivo* ([Kim, et al. 2012](#)). We first  
279 tested FvFlbA1-NLuc interaction with FvFlbA2, canonical G protein components, as well  
280 as other proteins that are known to interact with RGS proteins. For instance, *S. cerevisiae*  
281 RGS protein Sst1 N-terminus showed interaction with multiple proteins involved in stress  
282 response signaling (ScVps36, ScTlg2, and ScPep12) and *M. oryzae* RGS protein MoRgs1  
283 showing colocalization with a late endosome marker MoRab7 ([Burchett, et al. 2002](#),  
284 [Ramanujam, et al. 2013](#)). Figure 8 shows FvFlbA1 interacting with all selected proteins in  
285 *F. verticillioides*, with particularly strong associations with FvGpa1, FvGbb1 and FvRab11.  
286 Luciferase activity was detected with FvVps36, FvTlg2 and FvPep12, but these were not  
287 strong. CLuc-FvFlbA2 showed interaction with FvFlbA1-NLuc. When we made FvFlbA2-  
288 NLuc to test interaction with these set of proteins, we did not observe luciferase activity.  
289 However, we acknowledge that this outcome must be further verified by other methods  
290 before concluding that FvFlbA2 does not directly associate with G protein signaling  
291 components in *F. verticillioides*.

292

293 **Discussion**

294

295 Our previous study demonstrated that heterotrimeric G proteins and non-canonical G $\beta$   
296 components positively regulate the virulence and secondary metabolism ([Yan and Shim](#)  
297 [2020](#)). However, in addition to these core components, RGS proteins are well known as  
298 negative regulators of G protein signaling pathway to orchestrate this intricate cellular signal  
299 transduction mechanism. A further investigation showed that transcription levels of four  
300 putative RGS genes *FvFLBA1*, *FvFLBA2*, *FvRGSB* and *FvRGSC1* were significantly altered  
301 in  $\Delta$ Fvgbb1 deletion mutant when compared to the wild-type progenitor ([Mukherjee, et al.](#)  
302 [2011](#)). Further characterizations of *F. verticillioides* FvFlbA1 and FvFlbA2, the two FvFlbA  
303 paralogs, showed FvFlbA2 is negatively associated with FB1 production ([Mukherjee, et al.](#)  
304 [2011](#)). Both *FvFLBA1* and *FvFLBA2* mRNA transcription levels are relatively low (data not  
305 shown), which suggests that there could be rapid degradation of mRNA after regulating  
306 G $\alpha$  subunits or that the function of these RGS proteins are not transcription dependent. In  
307 this study, our aim was to test the hypothesis that two FvFlbA paralogs play unique roles  
308 and perhaps complement each other in *F. verticillioides*. Our study revealed that FvFlbA1  
309 function is not critical for FB1 production, whereas the deletion mutants  $\Delta$ FvflbA2 and  
310  $\Delta$ FvflbA2/A1 exhibited elevated mycotoxin production and defects in aerial growth.  
311  
312 BrlA is a critical transcription factor involved in activating conidiophore development in  
313 both *A. nidulans* and *A. niger*. FlbA was demonstrated to be required for BrlA activation  
314 ([Lee and Adams 1994](#)). The mutation of *flbA* in *A. nidulans* and *A. niger* resulted in the  
315 fluffier hyphal colony ([Krijgsheld, et al. 2013](#)). But in *F. verticillioides*, the deletion mutant  
316  $\Delta$ FvflbA2 showed a less fluffy phenotype similar to that observed in *M. oryzae*  $\Delta$ Morgs1  
317 whereas  $\Delta$ FvflbA1 did not exhibit defects in growth ([Ramanujam, et al. 2012](#)).  $\Delta$ FvflbA2

318 mutant showed reduced conidia production while conidiation was completely hindered in *A.*  
319 *nidulans flbA* mutant. Both  $\Delta FvflbA2$  and  $\Delta FvflbA2/A1$  deletion mutants showed  
320 precocious germination. One possible explanation for this difference in two fungi could be  
321 due to distinct asexual production mechanisms between *A. nidulans* and *F. verticillioides*.  
322 Conidia in *F. verticillioides* are formed through monophialidic conidiophore that typically  
323 develops a single long conidia chain ([Leslie and Summerell 2008](#)). *A. nidulans* conidiophore  
324 development is drastically different where conidiophore vesicle harbors a layer of metulae  
325 and phialides that can each produce a chain of approximately 100 conidia ([Yu 2010](#)). *A.*  
326 *nidulans* conidiophore development is one of the most extensively studied models in  
327 Ascomycetes. As described earlier, fungal asexual development is proposed to be regulated  
328 by BrlA-AbaA-WetA transcription factor cascade ([Yu 2010](#)). However, our results in *F.*  
329 *verticillioides* raise the question of whether putative BrlA-AbaA-WetA cascade follows the  
330 same expression pattern in two FvFlbA paralogs deletion mutants. Our transcription study  
331 showed that expression of these three genes was significantly lower but not completely  
332 abolished. This result shows a strong correlation with actual conidia production.  
333  
334 In *A. nidulans*, the *flbA* mutant showed reduced sterigmatocystin production ([Hicks, et al.](#)  
335 [1997](#)). Interestingly, *A. niger* is known to harbor the putative *FUM* gene cluster and is  
336 capable of synthesizing fumonisins ([Aerts, et al. 2018](#)). Transcriptome analysis of *flbA*  
337 mutant in *A. niger* demonstrated markedly down-regulated expression of *FUM21* which  
338 positively corresponds with other *FUM* genes expression and fumonisins production ([Aerts,](#)  
339 [et al. 2018](#)). In *F. verticillioides*, *FUM21* also functions as a putative Zn(II)<sub>2</sub>Cys<sub>6</sub>  
340 transcription factor that controls expression of genes in the *FUM* cluster, including *FUM1*

341 and *FUM8* ([Brown, et al. 2007](#)). *FUM21* locus is located adjacent to *FUM1* that encodes a  
342 polyketide synthase responsible for the first step of FB1 production. To further understand  
343 how FvFlbA paralogs regulate *FUM* genes expression, we tested transcription levels of  
344 *FUM1*, *FUM8* and *FUM21* in the mutants. Our results showed that these three key *FUM*  
345 genes were highly up-regulated in  $\Delta$ FvflbA2 and  $\Delta$ FvflbA/A1 mutants, which was consistent  
346 with our observation of elevated FB1 production in  $\Delta$ FvflbA2 and  $\Delta$ FvflbA2/A1 mutants.  
347 The same pattern of FlbA impacts on mycotoxin productions was also reported in the  
348 deletion mutants of FlbA paralogs in *F. graminearum* ([Park, et al. 2012](#)). FgflbA mutant  
349 strain produced significantly higher levels of mycotoxins including DON and ZEA  
350 compared to the wild-type progenitor. However, FgFlbB mutant showed no obvious  
351 deficiencies in mycotoxin production similar to what we observed in  $\Delta$ FvflbA1 mutant strain  
352 ([Park, et al. 2012](#)).

353

354 Inactivation of Rgs1 in *M. oryzae* led to precocious appressorium formation on both non-  
355 inductive and inductive surfaces, which negatively impacted the pathogen's ability to cause  
356 rice blast disease ([Liu, et al. 2007](#), [Zhang, et al. 2011a](#)). Similar outcomes were also observed  
357 when DEP or RGS domain were used to complement the  $\Delta$ Morgs1 mutation that failed to  
358 restore virulence on barley and rice ([Ramanujam, et al. 2012](#)). This study demonstrated that  
359 the DEP or the RGS domain alone could not rescue the infection ability in *M. oryzae*. In  
360 addition, *F. graminearum* FgFlbA was shown to play an important role in wheat scab  
361 virulence, where  $\Delta$ FgflbA mutant showing very limited infection limited to inoculated  
362 spikelets ([Park, et al. 2012](#)). However, our seedling rot assay revealed that FvFlbA1 and  
363 FvFlbA2 are not directly associated with virulence in *F. verticillioides*, similar to the G $\beta$

364 deletion mutant  $\Delta$ Fvgbb1 that did not have influence on stalk rot virulence. This result was  
365 consistent with our analyses of stress response and carbon utilization assays, in which both  
366 FvflbA1 and FvFlbA2 deletion mutants did not show any defects.

367

368 FlbA is well known as a negative regulator of the G protein signaling pathway. One  
369 important question we wanted to test was the interactions between two FvFlbA paralogs with  
370 canonical G protein components in *F. verticillioides*. Our split luciferase complementation  
371 assay demonstrated that FvFlbA1 interact with not only FvFlbA2 but also canonical G  
372 protein components. In our experiment, we failed to detect luciferase activity in  
373 transformants containing *FvFLBA2-NLuc* with select CLuc constructs. We also performed  
374 yeast two-hybrid assays but no interaction between these components were observed (data  
375 not shown). With these outcomes, we propose that FvFlbA2 does not directly interact with  
376 *F. verticillioides* canonical G protein components, and perhaps we can hypothesize that  
377 FvFlbA2 regulates FvFlbA1 and canonical heterotrimeric G protein components indirectly  
378 through yet-to-be determined signaling mechanisms. When we tried to test the cellular  
379 localization of two FlbA in *F. verticillioides*, we failed to detect the GFP signal in our tested  
380 conditions (data not shown). This may be due to the low level of RGS proteins in the cell or  
381 that these interactions may be transient under certain developmental or physiological stages  
382 of *F. verticillioides*. The mechanisms of how FlbA paralogs are important for FB1  
383 biosynthesis regulation while showing relatively low transcription levels remain unclear.  
384 While we predict that two FvFlbA paralogs share same localization with canonical  
385 heterotrimeric G protein components, e.g. FvGbb1 and FvGpa2 localized to the cell

386 membranes and vacuoles, respectively ([Yan and Shim 2020](#)), further study of FvFlbA  
387 cellular functions are necessary to answer these questions.

388

### 389 **Acknowledgements**

390

391 This research was supported in part by the Agriculture and Food Research Initiative  
392 Competitive Grants Program Grant (2013-68004-20359) from the USDA National Institute  
393 of Food and Agriculture. The authors declare no conflict of interest.

394

## 395 **References**

- 396
- 397 Aerts D, Hauer EE, Ohm RA, Arentshorst M, Teertstra WR, Phippen C, Ram AFJ, Frisvad  
398 JC, Wosten HAB (2018) The FlbA-regulated predicted transcription factor Fum21  
399 of *Aspergillus niger* is involved in fumonisin production. *Antonie Van Leeuwenhoek*  
400 111: 311-322 doi: 10.1007/s10482-017-0952-1
- 401 Alexander NJ, Proctor RH, McCormick SP (2009) Genes, gene clusters, and biosynthesis of  
402 trichothecenes and fumonisins in *Fusarium*. *Toxin reviews* 28: 198-215  
403 doi:10.3390/toxins11010036
- 404 Ballon DR, Flanary PL, Gladue DP, Konopka JB, Dohlman HG, Thorner J (2006) DEP-  
405 Domain-Mediated Regulation of GPCR Signaling Responses. *Cell* 126: 1079-1093  
406 doi: 10.1016/j.cell.2006.07.030
- 407 Blacutt AA, Gold SE, Voss KA, Gao M, Glenn AE (2018) *Fusarium verticillioides*:  
408 Advancements in Understanding the Toxicity, Virulence, and Niche Adaptations of  
409 a Model Mycotoxigenic Pathogen of Maize. *Phytopathology* 108: 312-326 doi:  
410 10.1094/PHYTO-06-17-0203-RVW
- 411 Brown DW, Butchko RA, Busman M, Proctor RH (2007) The *Fusarium verticillioides* *FUM*  
412 gene cluster encodes a Zn(II)2Cys6 protein that affects *FUM* gene expression and  
413 fumonisin production. *Eukaryot Cell* 6: 1210-1218 doi: 10.1128/EC.00400-06
- 414 Burchett SA, Flanary P, Aston C, Jiang L, Young KH, Uetz P, Fields S, Dohlman HG (2002)  
415 Regulation of stress response signaling by the N-terminal dishevelled/EGL-  
416 10/pleckstrin domain of Sst2, a regulator of G protein signaling in *Saccharomyces*  
417 *cerevisiae*. *J Biol Chem* 277: 22156-22167 doi: 10.1074/jbc.M202254200
- 418 Christensen S, Borrego E, Shim WB, Isakeit T, Kolomiets M (2012) Quantification of fungal  
419 colonization, sporogenesis, and production of mycotoxins using kernel bioassays. *J*  
420 *Vis Exp* doi: 10.3791/3727
- 421 Desjardins AE, Munkvold GP, Plattner RD, Proctor RH (2002) *FUM1*--a gene required for  
422 fumonisin biosynthesis but not for maize ear rot and ear infection by *Gibberella*  
423 *moniliformis* in field tests. *Mol Plant Microbe Interact* 15: 1157-1164 doi:  
424 10.1094/MPMI.2002.15.11.1157
- 425 Desjardins AE, Plattner RD (2000) Fumonisin B<sub>1</sub>-nonproducing strains of *Fusarium*  
426 *verticillioides* cause maize (*Zea mays*) ear infection and ear rot. *J Agric Food Chem*  
427 48: 5773-5780 doi: 10.1021/jf000619k
- 428 Dohlman HG (2009) RGS proteins the early days. *Prog Mol Biol Transl Sci* 86: 1-14 doi:  
429 10.1016/S1877-1173(09)86001-8
- 430 Hicks JK, Yu JH, Keller NP, Adams TH (1997) *Aspergillus* sporulation and mycotoxin  
431 production both require inactivation of the FadA G alpha protein-dependent  
432 signaling pathway. *EMBO J* 16: 4916-4923 doi: 10.1093/emboj/16.16.4916
- 433 Kim HK, Cho EJ, Jo S, Sung BR, Lee S, Yun SH (2012) A split luciferase complementation  
434 assay for studying in vivo protein-protein interactions in filamentous ascomycetes.  
435 *Curr Genet* 58: 179-189 doi: 10.1007/s00294-012-0375-5
- 436 Kjaerbolling I, Vesth TC, Frisvad JC, Nybo JL, Theobald S, Kuo A, Bowyer P, Matsuda Y,  
437 Mondo S, Lyhne EK, Kogle ME, Clum A, Lipzen A, Salamov A, Ngan CY, Daum  
438 C, Chiniquy J, Barry K, LaButti K, Haridas S, Simmons BA, Magnuson JK,  
439 Mortensen UH, Larsen TO, Grigoriev IV, Baker SE, Andersen MR (2018) Linking  
440 secondary metabolites to gene clusters through genome sequencing of six diverse



- 441 *Aspergillus* species. Proc Natl Acad Sci U S A 115: E753-E761 doi:  
442 10.1073/pnas.1715954115
- 443 Krijgsheld P, Nitsche BM, Post H, Levin AM, Muller WH, Heck AJ, Ram AF, Altelaar AF,  
444 Wosten HA (2013) Deletion of flbA results in increased secretome complexity and  
445 reduced secretion heterogeneity in colonies of *Aspergillus niger*. J Proteome Res 12:  
446 1808-1819 doi: 10.1021/pr301154w
- 447 Lee BN, Adams TH (1994) Overexpression of flbA, an early regulator of *Aspergillus* asexual  
448 sporulation, leads to activation of brlA and premature initiation of development. Mol  
449 Microbiol 14: 323-334 doi: 10.1111/j.1365-2958.1994.tb01293.x
- 450 Leslie JF, Summerell BA 2008 The *Fusarium* laboratory manual John Wiley & Sons, pp.  
451 Pages.
- 452 Liu H, Suresh A, Willard FS, Siderovski DP, Lu S, Naqvi NI (2007) Rgs1 regulates multiple  
453 Galpha subunits in *Magnaporthe* pathogenesis, asexual growth and thigmotropism.  
454 EMBO J 26: 690-700 doi: 10.1038/sj.emboj.7601536
- 455 Ma LJ, van der Does HC, Borkovich KA, et al (2010) Comparative genomics reveals mobile  
456 pathogenicity chromosomes in *Fusarium*. Nature 464: 367-373 doi:  
457 10.1038/nature08850
- 458 Mukherjee M, Kim JE, Park YS, Kolomiets MV, Shim WB (2011) Regulators of G-protein  
459 signalling in *Fusarium verticillioides* mediate differential host-pathogen responses  
460 on nonviable versus viable maize kernels. Mol Plant Pathol 12: 479-491 doi:  
461 10.1111/j.1364-3703.2010.00686.x
- 462 Park AR, Cho AR, Seo JA, Min K, Son H, Lee J, Choi GJ, Kim JC, Lee YW (2012)  
463 Functional analyses of regulators of G protein signaling in *Gibberella zeae*. Fungal  
464 Genet Biol 49: 511-520 doi: 10.1016/j.fgb.2012.05.006
- 465 Proctor RH, Van Hove F, Susca A, Stea G, Busman M, van der Lee T, Waalwijk C, Moretti  
466 A, Ward TJ (2013) Birth, death and horizontal transfer of the fumonisin biosynthetic  
467 gene cluster during the evolutionary diversification of *Fusarium*. Mol Microbiol 90:  
468 290-306 doi: 10.1111/mmi.12362
- 469 Ramanujam R, Calvert ME, Selvaraj P, Naqvi NI (2013) The late endosomal HOPS complex  
470 anchors active G-protein signaling essential for pathogenesis in *magnaporthe oryzae*.  
471 PLoS Pathog 9: e1003527 doi: 10.1371/journal.ppat.1003527
- 472 Ramanujam R, Xu Y, Hao L, Naqvi NI (2012) Structure-Function Analysis of Rgs1 in  
473 *Magnaporthe oryzae*: Role of DEP Domains in Subcellular Targeting. Plos One  
474 7: 10.1371/journal.pone.0041084
- 475 Sagaram US, Shim WB (2007) *Fusarium verticillioides* *GBB1*, a gene encoding  
476 heterotrimeric G protein beta subunit, is associated with fumonisin B biosynthesis  
477 and hyphal development but not with fungal virulence. Mol Plant Pathol 8: 375-384  
478 doi: 10.1111/j.1364-3703.2007.00398.x
- 479 Shim WB, Woloshuk CP (1999) Nitrogen repression of fumonisin B1 biosynthesis in  
480 *Gibberella fujikuroi*. FEMS Microbiol Lett 177: 109-116 doi: 10.1111/j.1574-  
481 6968.1999.tb13720.x
- 482 Xue C, Hsueh Y-P, Heitman J (2008) Magnificent seven: roles of G protein-coupled  
483 receptors in extracellular sensing in fungi. FEMS microbiology reviews 32: 1010-  
484 1032 doi:



- 485 Yan H, Huang J, Zhang H, Shim WB (2019) A Rab GTPase protein FvSec4 is necessary for  
486 fumonisin B1 biosynthesis and virulence in *Fusarium verticillioides*. *Curr Genet*  
487 10.1007/s00294-019-01013-6
- 488 Yan H, Shim WB (2020) Characterization of non-canonical G beta-like protein FvGbb2 and  
489 its relationship with heterotrimeric G proteins in *Fusarium verticillioides*. *Environ*  
490 *Microbiol* 22: 615-628 doi: 10.1111/1462-2920.14875
- 491 Yu JH (2010) Regulation of Development in *Aspergillus nidulans* and *Aspergillus fumigatus*.  
492 *Mycobiology* 38: 229-237 doi: 10.4489/MYCO.2010.38.4.229
- 493 Yu JH, Hamari Z, Han KH, Seo JA, Reyes-Dominguez Y, Scazzocchio C (2004) Double-  
494 joint PCR: a PCR-based molecular tool for gene manipulations in filamentous fungi.  
495 *Fungal Genet Biol* 41: 973-981 doi: 10.1016/j.fgb.2004.08.001
- 496 Zhang H, Mukherjee M, Kim JE, Yu W, Shim WB (2018) Fsr1, a striatin homologue, forms  
497 an endomembrane-associated complex that regulates virulence in the maize pathogen  
498 *Fusarium verticillioides*. *Mol Plant Pathol* 19: 812-826 doi: 10.1111/mpp.12562
- 499 Zhang H, Tang W, Liu K, Huang Q, Zhang X, Yan X, Chen Y, Wang J, Qi Z, Wang Z,  
500 Zheng X, Wang P, Zhang Z (2011a) Eight RGS and RGS-like proteins orchestrate  
501 growth, differentiation, and pathogenicity of *Magnaporthe oryzae*. *PLoS Pathog* 7:  
502 e1002450 doi: 10.1371/journal.ppat.1002450
- 503 Zhang Y, Choi YE, Zou X, Xu JR (2011b) The *FvMK1* mitogen-activated protein kinase  
504 gene regulates conidiation, pathogenesis, and fumonisin production in *Fusarium*  
505 *verticillioides*. *Fungal Genet Biol* 48: 71-79 doi: 10.1016/j.fgb.2010.09.004

506

507

508 **Figure legends**

509

510 **Fig. 1 Phylogenetic and domain analysis of FlbA proteins in select fungal species.**

511 Organism names and NCBI locus tag: FvFlbA2 (FVEG\_06192, 100% identify), FvFlbA1  
512 (FVEG\_08855, 52% identify), FoFlbA1 (FOXG\_08482, 98% identity), FoFlbA2  
513 (FOXG\_06495, 74% identity), FoFlbA3 (FOXG\_17640, 64% identity), FoFlbA4  
514 (FOXG\_09613, 53% identity), FoFlbA5 (FOXG\_07099, 53% identity) in *F. oxysporum f.*  
515 *sp. lycopersici 4287*, FgFlbA (FGSG\_06228, 98% identity), FgFlbB (FGSG\_03597, 50%  
516 identity) in *F. graminearum*, MoRgs1 in *Magnaporthe oryzae* (MGG\_14517, 63% identity),  
517 NcFlbA in *Neurospora crassa* OR74A (NCU08319, 74% identity), AnFlbA in *Aspergillus*  
518 *nidulans* FGSC A4 (An5893, 66% identity), AfFlbA in *A. fumigatus* Af293  
519 (AFUA\_2G11180,77%), SpRgs1 in *Schizosaccharomyces pombe* (SPAC22F3.12c, 31%  
520 identity), ScSst2 in *Saccharomyces cerevisiae* S288C (YLR452C, 36% identity). FoFlbA5  
521 was not included in this phylogenetic analysis.

522

523 **Fig. 2 Hyphal growth of  $\Delta FvflbA1$ ,  $\Delta FvflbA1$ -Com,  $\Delta FvflbA2$ ,  $\Delta FvflbA2$ -Com,**

524  **$\Delta FvflbA2/A1$  strains.** Colonies of the wild-type (WT),  $\Delta FvflbA1$ ,  $\Delta FvflbA1$ -Com,  
525  $\Delta FvflbA2$ ,  $\Delta FvflbA2$ -Com,  $\Delta FvflbA2/A1$  strains were incubated on V8, 0.2xPDA, myro  
526 and YEPD agar at room temperature for 8 days.

527

528 **Fig. 3 FvFlbA2 impacts on conidiation and germination.** (A) Conidia were harvested

529 from V8 agar plates after 8-day-incubation at room temperature. (B) WT,  $\Delta FvflbA1$ ,  
530  $\Delta FvflbA1$ -Com,  $\Delta FvflbA2$ ,  $\Delta FvflbA2$ -Com,  $\Delta FvflbA2/A1$  strains were cultured in

531 0.2xPDB liquid medium with gentle shaking. Conidial germination rate was counted under  
532 a microscope. All experiments were performed with at least three biological replicates. The  
533 letters suggest statistically significant differences analyzed by Ordinary One-way ANOVA  
534 Fisher's LSD test ( $p < 0.05$ ).

535

536 **Fig. 4 Colonization of two FvFlbA deletion mutants in kernels and FB1 assay.** *F.*  
537 *verticillioides* wild-type (WT),  $\Delta FvflbA1$ ,  $\Delta FvflbA1$ ,  $\Delta FvflbA2$ ,  $\Delta FvflbA2/A1$  and  
538 complemented strains were cultivated in (A) 2-g cracked autoclaved kernels and (B) four  
539 surface-sterilized kernels for seven days at room temperature. (C) FB1 production in WT,  
540 mutants and complemented strains cultured on nonviable kernels and (D) viable kernels after  
541 seven days incubation at room temperature. The relative FB1 production levels were  
542 normalized to fungal ergosterol. All experiments were performed with at least three  
543 biological replicates. The letters suggest statistically significant differences analyzed by  
544 Ordinary One-way ANOVA Fisher's LSD test ( $p < 0.05$ ).

545

546 **Fig. 5 Effects of FvFlbA1 and FvFlbA2 on conidia-related genes and key *FUM* genes**  
547 **transcription.** (A) Relative expression levels of putative *FvBRLA* (FVEG\_09661), *FvABAA*  
548 (FVEG\_00646) and *FvWETA* (FVEG\_02891) in wild-type,  $\Delta FvflbA1$ ,  $\Delta FvflbA2$ ,  
549  $\Delta FvflbA2/A1$  strains were normalized to *F. verticillioides*  $\beta$ -tubulin gene (FVEG\_04081).  
550 (B) Relative mRNA expression level of three key *FUM* genes in deletion mutant strains in  
551 contrast to wild type. All experiments were performed with at least three biological replicates.  
552 The letters suggest statistically significant differences analyzed by Ordinary One-way  
553 ANOVA Fisher's LSD test ( $p < 0.05$ ).

554

555 **Fig. 6 The influence of FvFlbA1 and FvFlbA2 on carbon utilization and stress response.**

556 (A) The colony of wild-type,  $\Delta FvflbA1$ ,  $\Delta FvflbA2$ ,  $\Delta FvflbA2/A1$  and complemented strains  
557 grown on modified Czapek-Dox agar plates with different carbon sources for 8 days. (B)  
558 Strains were cultured on Czapek-Dox agar plates with various stress agents for 8 days. The  
559 letters suggest statistically significant differences analyzed by Ordinary One-way ANOVA  
560 Fisher's LSD test ( $p < 0.05$ ).

561

562 **Fig. 7 The pathogenicity of FvFlbA mutant strains in corn seedling rot assay.** (A) A  
563 syringe needle was used to create wounds on one-week old silver queen seedlings. Spore  
564 suspensions ( $5 \mu\text{l}$ ,  $10^6/\text{ml}$ ) were inoculated on the wound sites. (B) The lesion size was  
565 quantified by Image J software after one-week incubation. All experiments were performed  
566 with at least three biological replicates.

567

568 **Fig. 8 Interaction study between FvFlbA1 and FvFlbA1 in *F. verticillioides*.** We used a  
569 split luciferase complementation assay to study the luminescence activity between FvFlbA1  
570 and FvFlb2. Additionally, FvFlbA1 also exhibited significantly luminescence activity with  
571 FvVps36, FvTlg2 and FvPep12, FvRab5, FvRab7, and FvRab11 compared to negative  
572 controls. Negative controls included FvFlbA1 + CLuc, NLuc + CLuc, and no vector (NA) +  
573 (NA). Luminescence activity was gained from three replicates.

574

575

576

577 **Supplementary information**

578

579 **Fig. S1. Sequence alignment FlbA ortholog proteins in select fungal species.** We aligned  
580 protein sequences of *Fusarium verticillioides* FvFlbA1, *F. verticillioides* FvFlbA2,  
581 *Saccharomyces cerevisiae* ScSst2, *A.nidulans* AnFlbA, *Neurospora crassa* NcFlbA, and  
582 *Magnaporthe oryzae* MoRgs1. Identical and similar sequences were displayed in the box.

583

584 **Fig. S2. Split marker approach employed in *FLBA* generating gene deletion mutants**  
585 **in *F. verticillioides*.** (A)  $\Delta$ FvflbA1 mutant was generated by replacing *FLBA1* gene with a  
586 hygromycin B phosphotransferase gene (*HPH*). (B) *FvFLBA2* gene was replaced by a  
587 hygromycin gene to generate a  $\Delta$ FvflbA2 mutant. (C)  $\Delta$ FvflbA2/A1*FvFLBA1* was generated  
588 by replacing *FLBA1* gene with a geneticin gene (*GEN*) in  $\Delta$ FvflbA2 background. (D)  
589 Mutants  $\Delta$ FvflbA1,  $\Delta$ FvflbA1-Com,  $\Delta$ FvflbA2/A1 were subject to qPCR using *FvFLBA1*  
590 gene primer. Relative expression was normalized to *F. verticillioides*  $\beta$ -tubulin gene  
591 (FVEG\_04081). (E) *FvFLBA2* gene transcription level was examined in WT,  $\Delta$ FvflbA2,  
592  $\Delta$ FvflbA2-Com,  $\Delta$ FvflbA2/A1 strains.

593

594 **Fig. S3. Relative FB1 expression in wild-type and FvflbA mutants.** FB1 was extracted  
595 from supernatant (2ml) of 7-day incubation at 150 RPM in myro liquid culture. In details,  
596 YEPD mycelial samples (3 dpi) were harvested through Miracloth (EMD Millipore).  
597 Subsequently, mycelia (0.3g) were inoculated into 100 ml myro liquid medium at room  
598 temperature.

## Yan et al. Fig. 1

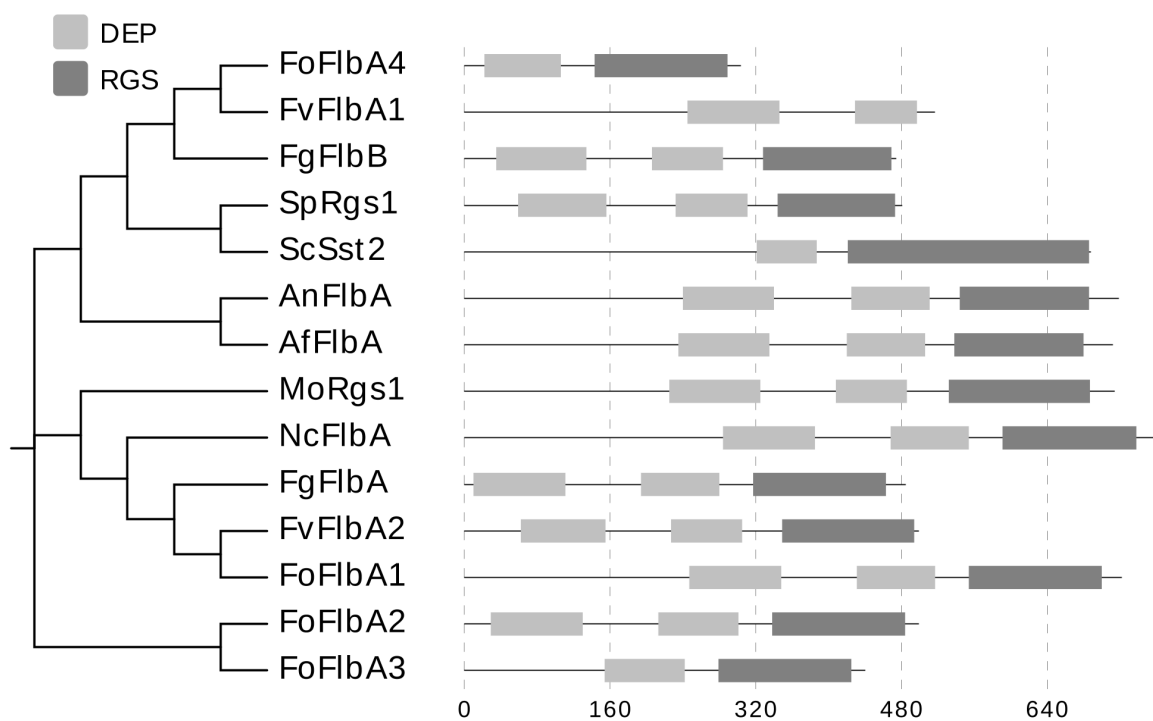

Yan et al. Fig. 2

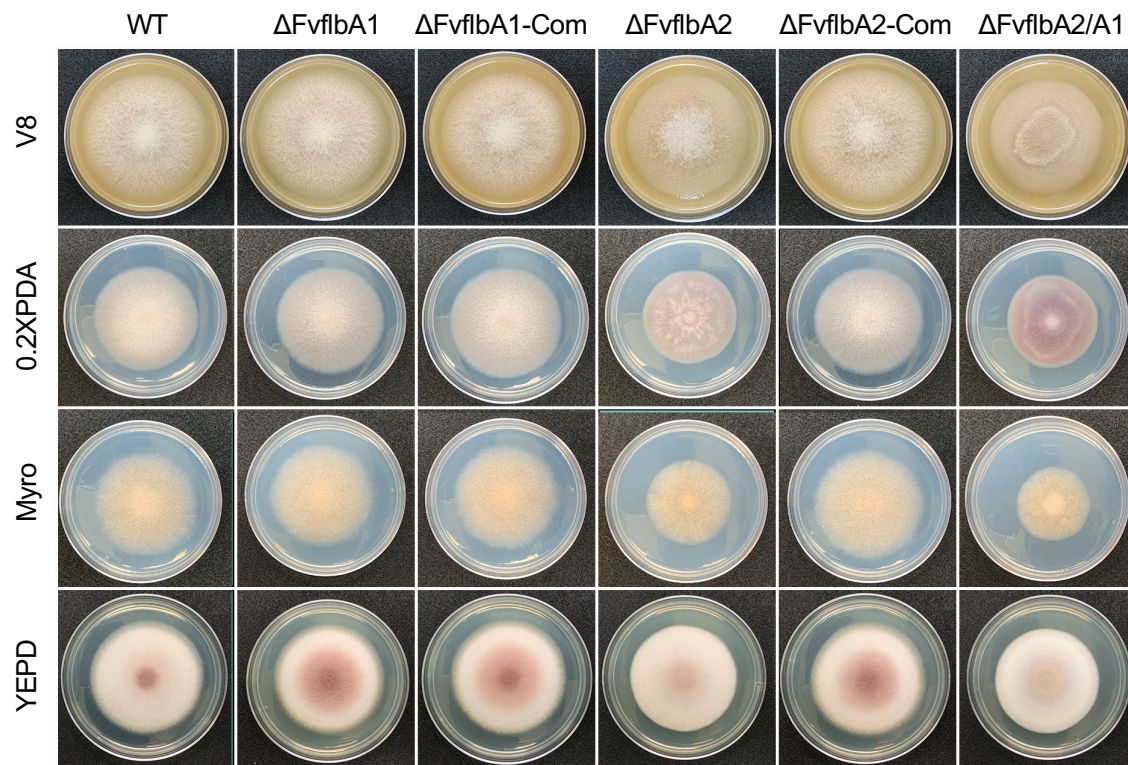

## Yan et al. Fig. 3

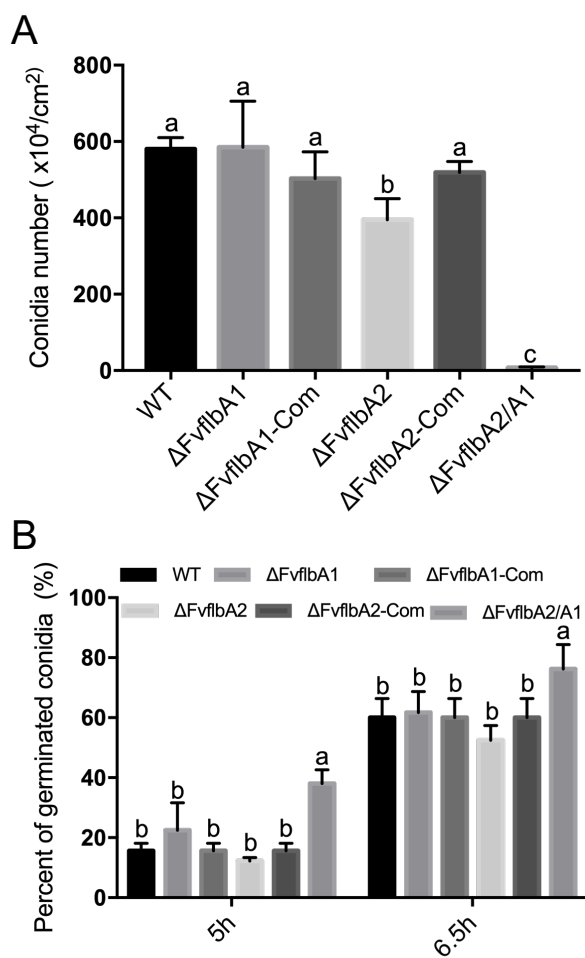



## Yan et al. Fig. 4

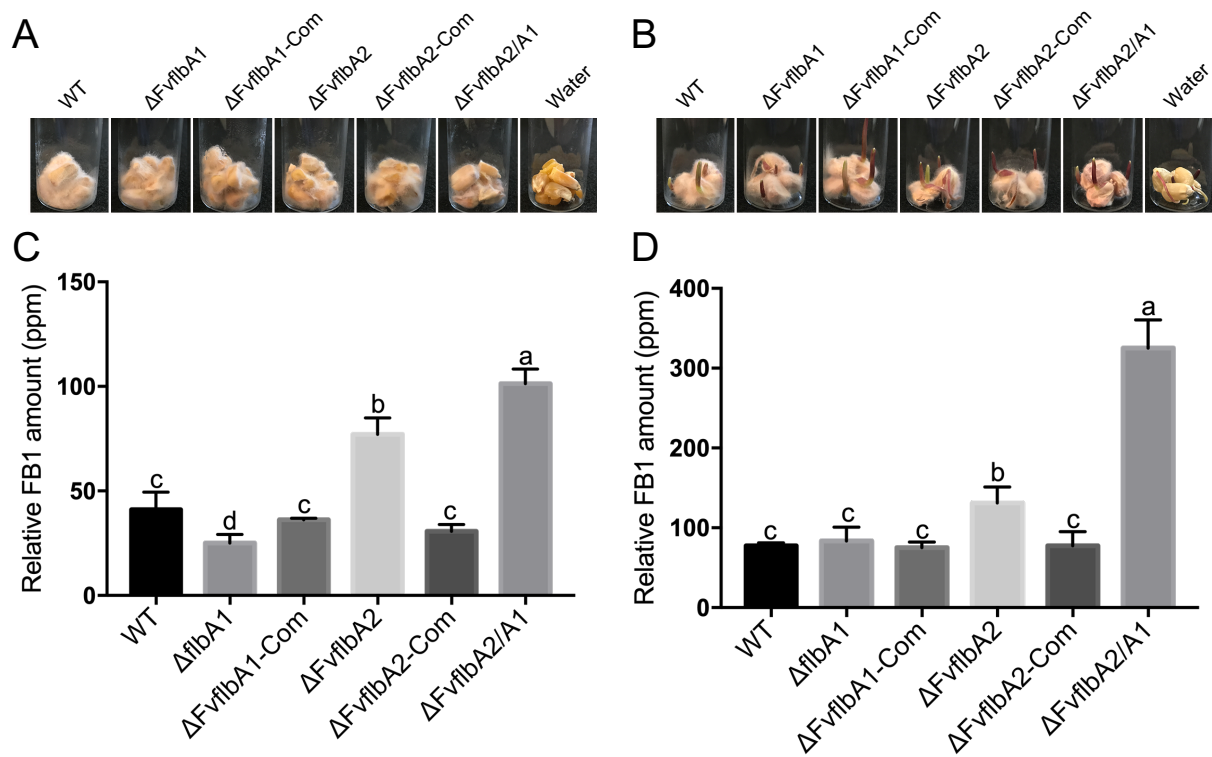

## Yan et al. Fig. 5

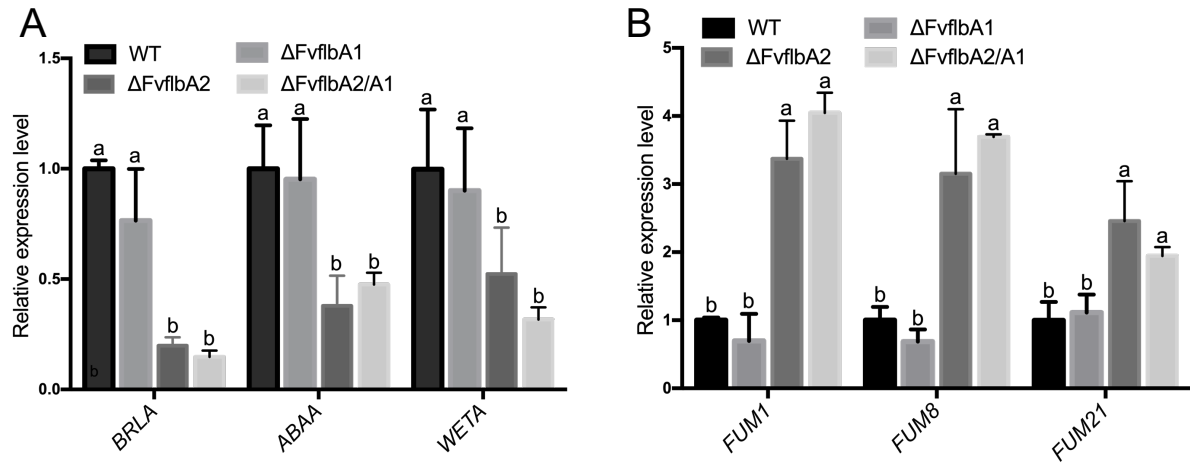

## Yan et al. Fig. 6

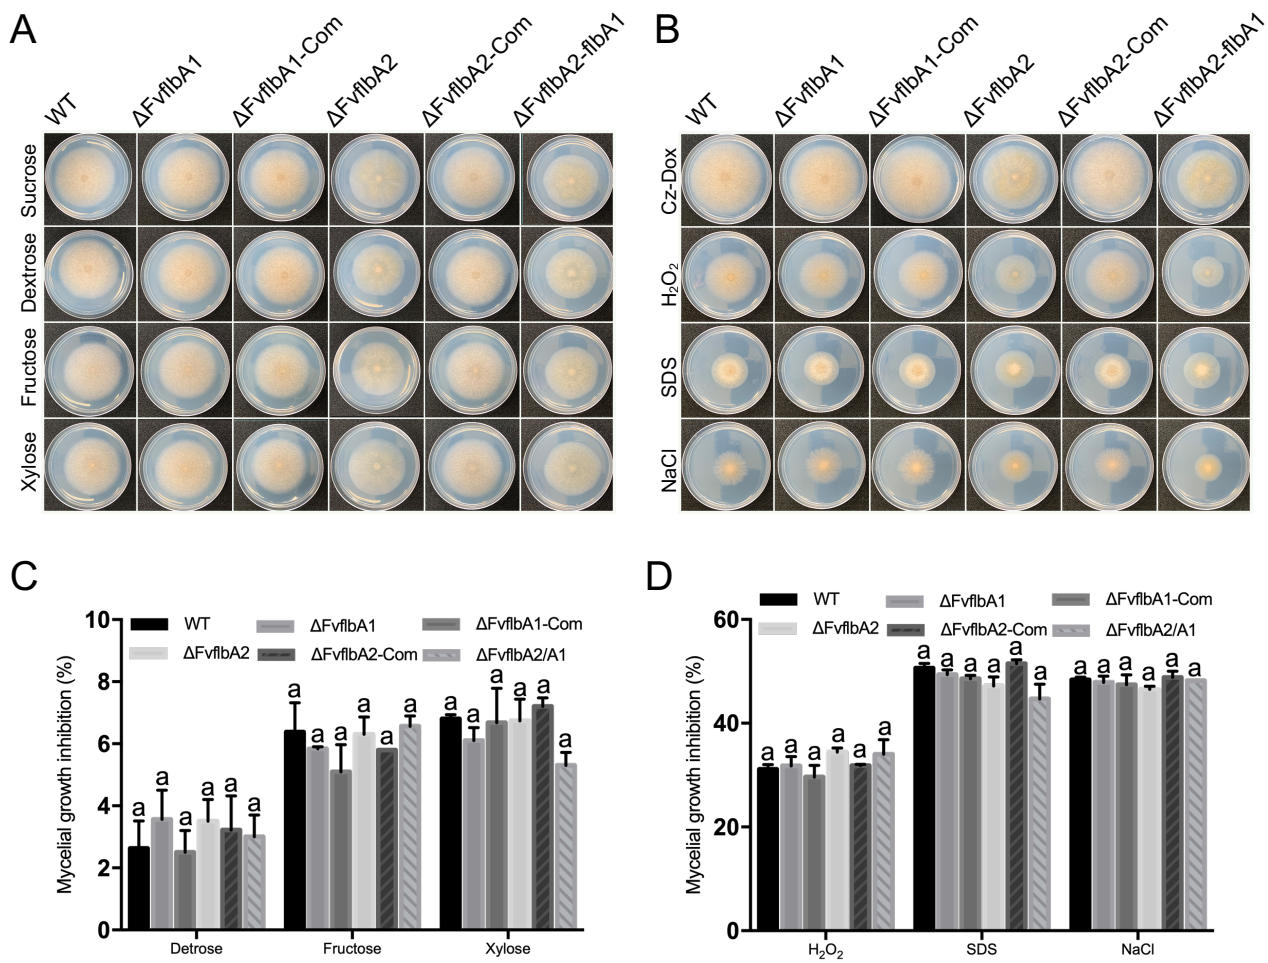

## Yan et al. Fig. 7

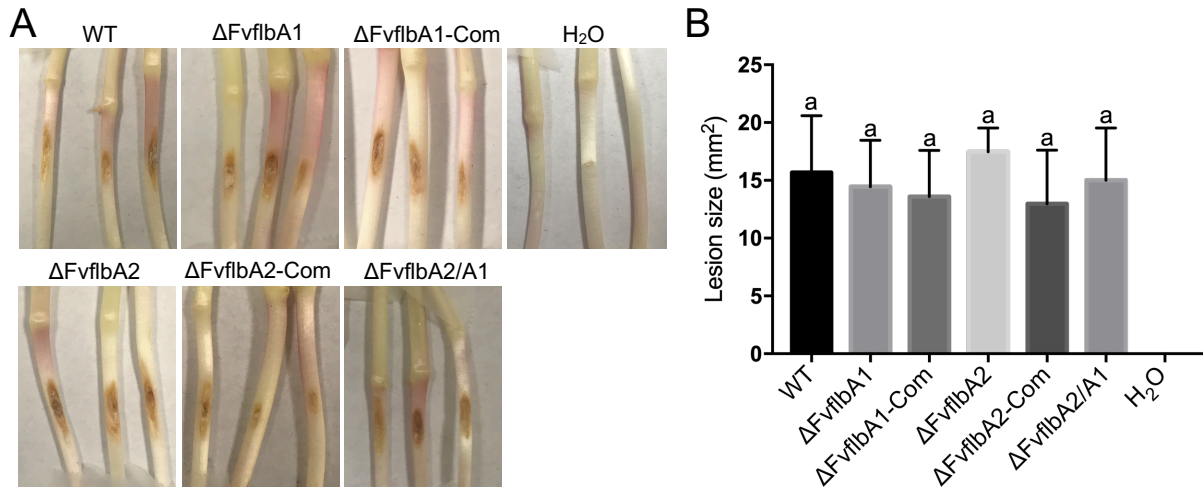





## Yan et al. Fig. S2

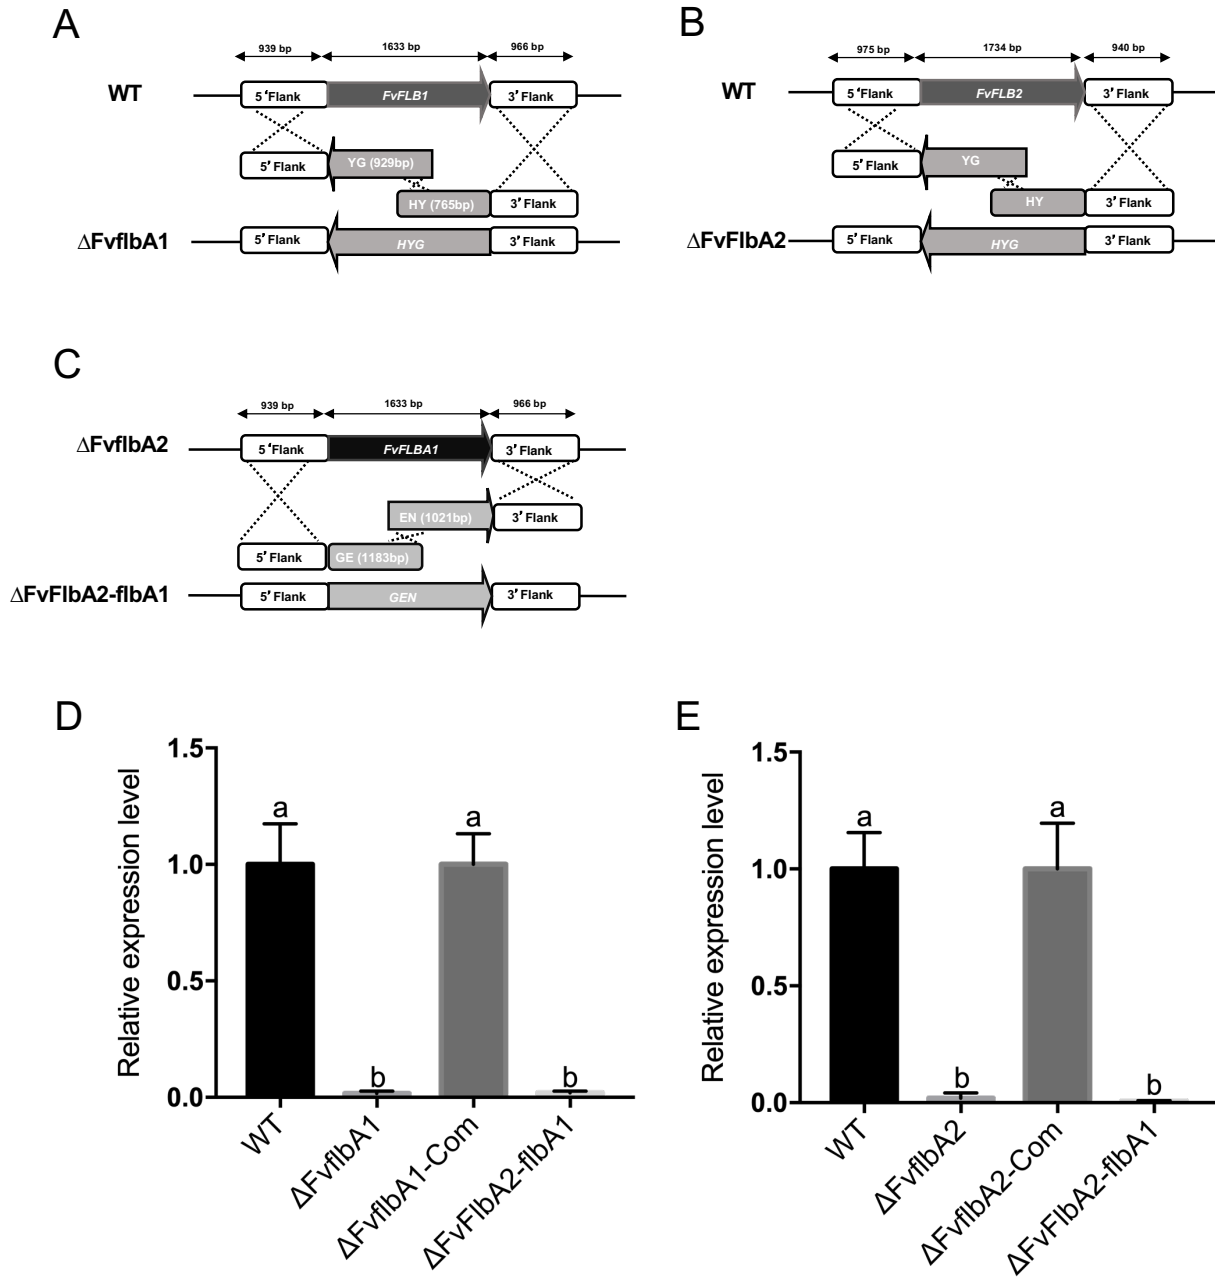

## Yan et al. Fig. S3

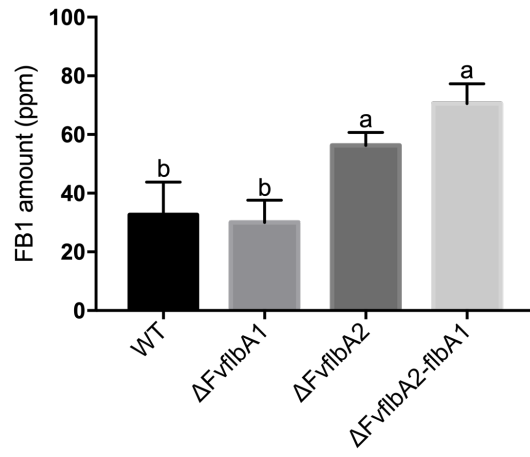

Source: http://biorxiv.org/content/10.1101/2020.09.22.309260v1.full.pdf
